# Supplementary material for: STAT3 and NTRK2 Genes Predicted by the Bioinformatics Approach May Play Important Roles in the Pathogenesis of Multiple Sclerosis and Obsessive–Compulsive Disorder
Source: MDPI journal article supplement (doi:10.3390/jpm12071043), 2022-06-26
Supplement: s1 [file s1]

## Supplementary Information

### Supplementary BOX S1. Network centrality parameters

In each network, identification and measurement of centrality can reveal the important parts of the network. Centrality parameters consist of degree, betweenness centrality, and closeness centrality. [1,2]. Degree centrality indicates the number of connections/links of a single node in a network. Betweenness centrality measures the grade to which nodes form a bridge between each other. This parameter gives the most influential node in the network. Nodes with higher betweenness centrality have the main role in controlling the flow around the network [1-3]. Closeness centrality indicates how close is a node to the other nodes in the network (Supplementary Figure 1).

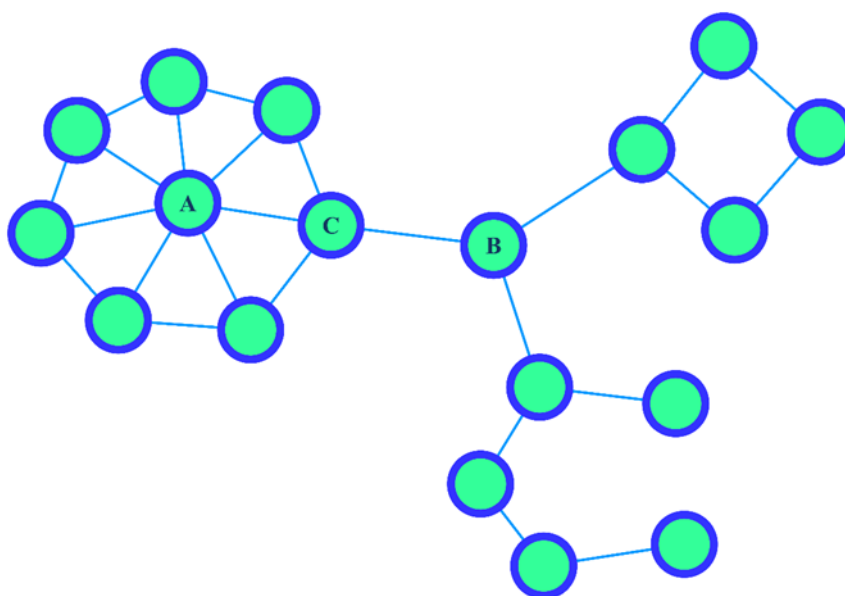

**Supplementary Figure S1.** Schematic representation of centrality parameters in a network. Three parameters, such as degree, betweenness centrality, and closeness centrality describe the centrality power in each network. A more connected node has a higher degree (A), the node with higher betweenness centrality forms a bridge between other nodes and has an important role in controlling the flow through the whole network (B), and the closest node to the other hubs shows greater closeness centrality (C).

**Supplementary Table S1.** Genes associated with multiple sclerosis are based on literature review and Harmonizome database.

| Index | Official Symbol | Official Full Name                                                | Ensembl ID      |
|-------|-----------------|-------------------------------------------------------------------|-----------------|
| 1.    | ABCB6           | ATP-binding cassette sub-family B member 6                        | ENSG00000115657 |
| 2.    | ABLIM1          | Actin-binding LIM protein 1                                       | ENSG00000099204 |
| 3.    | ACCN1           | Acid-sensing ion channel subunit 2                                | ENSG00000108684 |
| 4.    | ACE             | Angiotensin-converting enzyme                                     | ENSG00000159640 |
| 5.    | ACTN1           | Alpha-actinin-1                                                   | ENSG00000072110 |
| 6.    | ADAMTS14        | A disintegrin and metalloproteinase with thrombospondin motifs 14 | ENSG00000138316 |

|     |          |                                                                   |                 |
|-----|----------|-------------------------------------------------------------------|-----------------|
| 7.  | AHI1     | Involved in vesicle trafficking and required for ciliogenesis     | ENSG00000135541 |
| 8.  | ALK      | ALK tyrosine kinase receptor                                      | ENSG00000171094 |
| 9.  | ANKRD15  | KN motif and ankyrin repeat domain-containing protein 1           | ENSG00000107104 |
| 10. | ANKRD55  | Ankyrin repeat domain-containing protein 55                       | ENSG00000164512 |
| 11. | APOA1    | Apolipoprotein A-I                                                | ENSG00000118137 |
| 12. | APOE     | Apolipoprotein E                                                  | ENSG00000130203 |
| 13. | ARNTL    | Aryl hydrocarbon receptor nuclear translocator-like protein 1     | ENSG00000133794 |
| 14. | ASAP1    | Arf-GAP with SH3 domain                                           | ENSG00000153317 |
| 15. | BACH2    | Transcription regulator protein BACH2                             | ENSG00000112182 |
| 16. | BATF     | Basic leucine zipper transcriptional factor ATF-like              | ENSG00000156127 |
| 17. | bax      | Apoptosis regulator BAX                                           | ENSG00000087088 |
| 18. | BCHE     | Cholinesterase                                                    | ENSG00000114200 |
| 19. | BCL10    | B-cell lymphoma/leukemia 10                                       | ENSG00000142867 |
| 20. | BCL11A   | B-cell lymphoma/leukemia 11A                                      | ENSG00000119866 |
| 21. | bcl2     | Apoptosis regulator Bcl-2                                         | ENSG00000171791 |
| 22. | BCL2L1   | Bcl-2-like protein 1                                              | ENSG00000171552 |
| 23. | BDNF     | Brain-derived neurotrophic factor                                 | ENSG00000176697 |
| 24. | BMP4     | Bone morphogenetic protein 4                                      | ENSG00000125378 |
| 25. | BRD2     | Bromodomain-containing protein 2                                  | ENSG00000204256 |
| 26. | BTNL2    | Butyrophilin-like protein 2                                       | ENSG00000204290 |
| 27. | C16orf75 | RecQ-mediated genome instability protein 2                        | ENSG00000175643 |
| 28. | C1GALT1  | Glycoprotein-N-acetylgalactosamine 3-beta-galactosyltransferase 1 | ENSG00000106392 |
| 29. | C1orf106 | Innate immunity activator protein                                 | ENSG00000163362 |
| 30. | C20orf46 | Transmembrane protein 74B                                         | ENSG00000125895 |
| 31. | C2orf13  | Aprataxin and PNK-like factor                                     | ENSG00000169621 |
| 32. | C6ORF10  | Uncharacterized protein C6orf10                                   | ENSG00000204296 |
| 33. | C6orf15  | Uncharacterized protein C6orf15                                   | ENSG00000204542 |
| 34. | CASK     | Peripheral plasma membrane protein CASK                           | ENSG00000147044 |
| 35. | CASP-9   | Caspase-9                                                         | ENSG00000132906 |
| 36. | CBLB     | E3 ubiquitin-protein ligase CBL-B                                 | ENSG00000114423 |
| 37. | CCHCR1   | Coiled-coil alpha-helical rod protein 1                           | ENSG00000204536 |
| 38. | CCL5     | C-C motif chemokine 5                                             | ENSG00000271503 |
| 39. | CCR5     | C-C chemokine receptor type 5                                     | ENSG00000160791 |
| 40. | CD14     | Monocyte differentiation antigen CD14                             | ENSG00000170458 |
| 41. | CD2      | T-cell surface antigen CD2                                        | ENSG00000116824 |
| 42. | CD226    | CD226 antigen                                                     | ENSG00000150637 |
| 43. | CD25     | interleukin 2 receptor subunit alpha                              | ENSG00000134460 |
| 44. | CD28     | T-cell-specific surface glycoprotein CD28                         | ENSG00000178562 |
| 45. | CD3D     | T-cell surface glycoprotein CD3 delta chain                       | ENSG00000167286 |

|     |              |                                                            |                 |
|-----|--------------|------------------------------------------------------------|-----------------|
| 46. | CD3E         | T-cell surface glycoprotein CD3 epsilon chain              | ENSG00000198851 |
| 47. | CD3G         | T-cell surface glycoprotein CD3 gamma chain                | ENSG00000160654 |
| 48. | CD4          | T-cell surface glycoprotein CD4                            | ENSG00000010610 |
| 49. | CD40         | Tumor necrosis factor receptor superfamily member 5        | ENSG00000101017 |
| 50. | CD45 (PTPRC) | Receptor-type tyrosine-protein phosphatase C               | ENSG00000081237 |
| 51. | CD48         | CD48 antigen                                               | ENSG00000117091 |
| 52. | CD58         | Lymphocyte function-associated antigen 3                   | ENSG00000116815 |
| 53. | CD6          | T-cell differentiation antigen CD6                         | ENSG00000013725 |
| 54. | CD69         | Early activation antigen CD69                              | ENSG00000110848 |
| 55. | CD80         | T-lymphocyte activation antigen CD80                       | ENSG00000121594 |
| 56. | CD86         | T-lymphocyte activation antigen CD86                       | ENSG00000114013 |
| 57. | CDH12        | Cadherin-12                                                | ENSG00000154162 |
| 58. | CDK2AP1      | Cyclin-dependent kinase 2-associated protein 1             | ENSG00000111328 |
| 59. | CHRM3        | Muscarinic acetylcholine receptor M3                       | ENSG00000133019 |
| 60. | CHST9        | Carbohydrate sulfotransferase 9                            | ENSG00000154080 |
| 61. | CIITA        | MHC class II transactivator                                | ENSG00000179583 |
| 62. | CITED2       | Cbp/p300-interacting transactivator 2                      | ENSP00000356623 |
| 63. | CLEC16A      | Protein CLEC16A                                            | ENSG00000038532 |
| 64. | CLECL1       | C-type lectin-like domain family 1                         | ENSG00000184293 |
| 65. | CLOCK        | Circadian locomotor output cycles protein kaput            | ENSG00000134852 |
| 66. | CNR1         | Cannabinoid receptor 1                                     | ENSG00000118432 |
| 67. | CNTF         | Ciliary neurotrophic factor                                | ENSG00000242689 |
| 68. | CNTN6        | Contactin-6                                                | ENSG00000134115 |
| 69. | COL2A1       | Collagen alpha-1(II) chain                                 | ENSG00000139219 |
| 70. | COX10        | Protoheme IX farnesyltransferase                           | ENSG00000006695 |
| 71. | CPAMD8       | C3 and PZP like, alpha-2-macroglobulin domain containing 8 | ENSG00000160111 |
| 72. | CPE          | Carboxypeptidase E                                         | ENSG00000109472 |
| 73. | CRYAB        | Alpha-crystallin B chain                                   | ENSG00000109846 |
| 74. | CSMD1        | CUB and sushi domain-containing protein 1                  | ENSG00000183117 |
| 75. | CTLA4        | Cytotoxic T-lymphocyte protein 4                           | ENSG00000163599 |
| 76. | CTNNA3       | Catenin alpha-3                                            | ENSG00000183230 |
| 77. | CTNNB1       | Catenin beta-1                                             | ENSG00000168036 |
| 78. | CXCL12       | Stromal cell-derived factor 1                              | ENSG00000107562 |
| 79. | CXCR2        | C-X-C chemokine receptor type 2                            | ENSG00000180871 |
| 80. | CXCR4        | C-X-C chemokine receptor type 4                            | ENSG00000121966 |
| 81. | CXCR5        | C-X-C chemokine receptor type 5                            | ENSG00000160683 |

|      |         |                                                                    |                 |
|------|---------|--------------------------------------------------------------------|-----------------|
| 82.  | CYP24A1 | 1,25-dihydroxyvitamin D(3) 24-hydroxylase, mitochondrial           | ENSG00000019186 |
| 83.  | CYP27B1 | 25-hydroxyvitamin D-1 alpha-hydroxylase                            | ENSG00000111012 |
| 84.  | DAPK1   | Death-associated protein kinase 1                                  | ENSG00000196730 |
| 85.  | DBC1    | Cell cycle and apoptosis regulator protein 2                       | ENSG00000158941 |
| 86.  | DDEF2   | Arf-GAP with SH3 domain                                            | ENSG00000151693 |
| 87.  | DDX39B  | Spliceosome RNA helicase DDX39B                                    | ENSG00000198563 |
| 88.  | DHCR7   | 7-dehydrocholesterol reductase                                     | ENSG00000172893 |
| 89.  | DHX16   | Putative pre-mRNA-splicing factor ATP-dependent RNA helicase DHX16 | ENSG00000204560 |
| 90.  | DKK1    | Dedicator of cytokinesis protein 1                                 | ENSG00000107984 |
| 91.  | DKKL1   | Dickkopf-like protein 1                                            | ENSG00000104901 |
| 92.  | DLEU1   | Leukemia-associated protein 1                                      | ENSG00000176124 |
| 93.  | DLG1    | Disks large homolog 1                                              | ENSG00000075711 |
| 94.  | DOCK1   | Dedicator of cytokinesis protein 1                                 | ENSG00000150760 |
| 95.  | EAAT2   | Excitatory amino acid transporter 2                                | ENSG00000110436 |
| 96.  | EDNRB   | Endothelin receptor type B                                         | ENSG00000136160 |
| 97.  | EFNB1   | Ephrin-B1                                                          | ENSG00000090776 |
| 98.  | EFNB2   | Ephrin-B2                                                          | ENSG00000125266 |
| 99.  | EGFR    | Epidermal growth factor receptor                                   | ENSG00000146648 |
| 100. | EHMT2   | Histone-lysine N-methyltransferase EHMT2                           | ENSG00000204371 |
| 101. | EN1     | Homeobox protein engrailed-1                                       | ENSG00000163064 |
| 102. | EOMES   | Eomesodermin homolog                                               | ENSG00000163508 |
| 103. | EPHA3   | Ephrin type-A receptor 3                                           | ENSG00000044524 |
| 104. | EPHA4   | Ephrin type-A receptor 4                                           | ENSG00000116106 |
| 105. | EPHB2   | Ephrin type-B receptor 2                                           | ENSG00000133216 |
| 106. | EPS15L1 | Epidermal growth factor receptor substrate 15-like 1               | ENSG00000127527 |
| 107. | ERAP1   | Endoplasmic reticulum aminopeptidase 1                             | ENSG00000164307 |
| 108. | ESR1    | Estrogen receptor                                                  | ENSG00000091831 |
| 109. | ESR2    | Estrogen receptor beta                                             | ENSG00000140009 |
| 110. | ETS1    | Protein C-ets-1                                                    | ENSG00000134954 |
| 111. | EVI5    | Ecotropic viral integration site 5 protein homolog                 | ENSG00000067208 |
| 112. | FAM119B | EEF1A lysine methyltransferase 3                                   | ENSG00000123427 |
| 113. | FAM69   | Protein FAM69A                                                     | ENSG00000154511 |
| 114. | FAS     | Tumor necrosis factor receptor superfamily member 6                | ENSG00000026103 |
| 115. | FBXO48  | F-box protein 48                                                   | ENSG00000204923 |
| 116. | FCGR2A  | Low-affinity immunoglobulin gamma Fc region receptor II-a          | ENSG00000143226 |
| 117. | FCGR3B  | Low-affinity immunoglobulin gamma Fc region receptor III-B         | ENSG00000162747 |
| 118. | FCRL3   | Fc receptor-like protein 3                                         | ENSG00000160856 |

|      |          |                                                                |                 |
|------|----------|----------------------------------------------------------------|-----------------|
| 119. | FOXO3A   | Forkhead box protein O3                                        | ENSG00000118689 |
| 120. | FOXP3    | Forkhead box protein P3                                        | ENSG00000049768 |
| 121. | FRS3     | Fibroblast growth factor receptor substrate 3                  | ENSG00000137218 |
| 122. | FTO      | Alpha-ketoglutarate-dependent dioxygenase<br>FTO               | ENSG00000140718 |
| 123. | FUT8     | Alpha-(1,6)-fucosyltransferase                                 | ENSG00000033170 |
| 124. | FYN      | Tyrosine-protein kinase Fyn                                    | ENSG00000010810 |
| 125. | GALC     | Galactocerebrosidase                                           | ENSG00000054983 |
| 126. | GCA      | Grancalcin                                                     | ENSG00000115271 |
| 127. | GFI1     | Zinc finger protein Gfi-1                                      | ENSG00000162676 |
| 128. | GLO1     | Lactoylglutathione lyase                                       | ENSG00000124767 |
| 129. | GPC5     | Glypican-5                                                     | ENSG00000179399 |
| 130. | GRIK1    | Glutamate receptor ionotropic, kainate 1                       | ENSG00000171189 |
| 131. | GRIN2A   | Glutamate receptor ionotropic                                  | ENSG00000183454 |
| 132. | GSK3β    | Glycogen synthase kinase-3 beta                                | ENSG00000082701 |
| 133. | HHEX     | Hematopoietically-expressed homeobox<br>protein HHEX           | ENSG00000152804 |
| 134. | HLA-A    | HLA class I histocompatibility antigen, A-3<br>alpha chain     | ENSG00000206503 |
| 135. | HLA-B    | HLA class I histocompatibility antigen, B-7<br>alpha chain     | ENSG00000234745 |
| 136. | HLA-C    | HLA class I histocompatibility antigen                         | ENSG00000204525 |
| 137. | HLA-DMA  | HLA class II histocompatibility antigen                        | ENSG00000204257 |
| 138. | HLA-DMB  | HLA class II histocompatibility antigen                        | ENSG00000242574 |
| 139. | HLA-DPA1 | HLA class II histocompatibility antigen                        | ENSG00000231389 |
| 140. | HLA-DPB1 | HLA class II histocompatibility antigen, DP<br>beta 1 chain    | ENSG00000223865 |
| 141. | HLA-DQA1 | Major histocompatibility complex, class II,<br>DQ alpha 1      | ENSG00000196735 |
| 142. | HLA-DQA2 | HLA class II histocompatibility antigen, DQ<br>alpha 2 chain   | ENSG00000237541 |
| 143. | HLA-DQB2 | Major histocompatibility complex, class II,<br>DQ beta 2       | ENSG00000232629 |
| 144. | HLA-DQβ  | HLA class II histocompatibility antigen, DQ<br>beta 1 chain    | ENSG00000179344 |
| 145. | HLA-DRA  | HLA class II histocompatibility antigen, DR<br>alpha chain     | ENSG00000204287 |
| 146. | HLA-DRB5 | HLA class II histocompatibility antigen                        | ENSG00000198502 |
| 147. | HLA-DRβ  | HLA class II histocompatibility antigen,<br>DRB1-15 beta chain | ENSG00000196126 |
| 148. | HLA-F    | HLA class I histocompatibility antigen                         | ENSG00000204642 |
| 149. | HLA-G    | HLA class I histocompatibility antigen,<br>alpha chain G       | ENSG00000204632 |
| 150. | HOMER2   | Homer protein homolog 2                                        | ENSG00000103942 |
| 151. | HTR7     | 5-hydroxytryptamine receptor 7                                 | ENSG00000148680 |
| 152. | ICAM-1   | Intercellular adhesion molecule 1                              | ENSG00000090339 |

|      |         |                                                           |                 |
|------|---------|-----------------------------------------------------------|-----------------|
| 153. | IFI30   | Gamma-interferon-inducible lysosomal thiol reductase      | ENSG00000216490 |
| 154. | IFIH1   | Interferon-induced helicase C domain-containing protein 1 | ENSG00000115267 |
| 155. | IFNAR1  | Interferon alpha/beta receptor 1                          | ENSG00000142166 |
| 156. | IFNAR2  | Interferon alpha/beta receptor 2                          | ENSG00000159110 |
| 157. | IFNG    | Interferon-gamma                                          | ENSG00000111537 |
| 158. | IFNGR2  | Interferon-gamma receptor 2                               | ENSG00000159128 |
| 159. | IGF2R   | Cation-independent mannose-6-phosphate receptor           | ENSG00000197081 |
| 160. | IL1     | Interleukin-1 alpha                                       | ENSG00000115008 |
| 161. | IL10    | Interleukin-10                                            | ENSG00000136634 |
| 162. | IL10R1  | Interleukin-10 receptor subunit alpha                     | ENSG00000110324 |
| 163. | IL-12   | Interleukin-12 subunit alpha                              | ENSG00000168811 |
| 164. | IL12B   | Interleukin-12 subunit beta                               | ENSG00000113302 |
| 165. | IL17    | Interleukin-17A                                           | ENSG00000112115 |
| 166. | IL17F   | Interleukin-17F                                           | ENSG00000112116 |
| 167. | IL18    | Interleukin-18                                            | ENSG00000150782 |
| 168. | IL1R    | Interleukin-1 receptor type 1                             | ENSG00000115594 |
| 169. | IL1RA   | Interleukin-1 receptor antagonist protein                 | ENSG00000136689 |
| 170. | IL2     | Interleukin-2                                             | ENSG00000109471 |
| 171. | IL22RA2 | Interleukin-22 receptor subunit alpha-2                   | ENSG00000164485 |
| 172. | IL23R   | Interleukin-23 receptor                                   | ENSG00000162594 |
| 173. | IL2RB   | Interleukin-2 receptor subunit beta                       | ENSG00000100385 |
| 174. | IL4     | Interleukin-4                                             | ENSG00000113520 |
| 175. | IL4R    | Interleukin-4 receptor subunit alpha                      | ENSG00000077238 |
| 176. | IL5RA   | Interleukin-5 receptor subunit alpha                      | ENSG00000091181 |
| 177. | IL6     | Interleukin-6                                             | ENSG00000136244 |
| 178. | IL7     | Interleukin-7                                             | ENSG00000104432 |
| 179. | IL7RA   | Interleukin-7 receptor subunit alpha                      | ENSG00000168685 |
| 180. | IL8     | Interleukin-8                                             | ENSG00000169429 |
| 181. | IL9     | Interleukin-9                                             | ENSG00000145839 |
| 182. | ILK     | Integrin-linked protein kinase                            | ENSG00000166333 |
| 183. | IQCB1   | IQ calmodulin-binding motif-containing protein1           | ENSG00000173226 |
| 184. | IRF5    | Interferon regulatory factor 5                            | ENSG00000128604 |
| 185. | IRF8    | Interferon regulatory factor 8                            | ENSG00000140968 |
| 186. | IRS2    | Insulin receptor substrate 2                              | ENSG00000185950 |
| 187. | ITGA4   | Integrin alpha-4                                          | ENSG00000115232 |
| 188. | ITGA6   | Integrin alpha-6                                          | ENSG00000091409 |
| 189. | ITGAM   | Integrin alpha-M                                          | ENSG00000169896 |
| 190. | ITGB2   | Integrin beta-2                                           | ENSG00000160255 |
| 191. | JAG1    | Protein jagged-1                                          | ENSG00000101384 |
| 192. | JRKL    | Jerky protein homolog-like                                | ENSG00000183340 |
| 193. | KCNH7   | Potassium voltage-gated channel subfamily H member 7      | ENSG00000184611 |

|      |          |                                                                         |                 |
|------|----------|-------------------------------------------------------------------------|-----------------|
| 194. | KCNK5    | Potassium channel subfamily K member 5                                  | ENSG00000164626 |
| 195. | KDR      | Vascular endothelial growth factor receptor 2                           | ENSG00000128052 |
| 196. | KIF1B    | Kinesin-like protein KIF1B                                              | ENSG00000054523 |
| 197. | KIF21B   | Kinesin-like protein KIF21B                                             | ENSG00000116852 |
| 198. | KLF4     | Krueppel-like factor 4                                                  | ENSG00000136826 |
| 199. | KLRB1    | Killer cell lectin-like receptor subfamily B member 1                   | ENSG00000111796 |
| 200. | KPNB1    | Importin subunit beta-1                                                 | ENSG00000108424 |
| 201. | LAG3     | Lymphocyte activation gene 3 protein                                    | ENSG00000089692 |
| 202. | LPIN3    | Phosphatidate phosphatase LPIN3                                         | ENSG00000132793 |
| 203. | LPP      | Lipoma-preferred partner                                                | ENSG00000145012 |
| 204. | LRMP     | Lymphoid-restricted membrane protein                                    | ENSG00000118308 |
| 205. | LRP2     | Low-density lipoprotein receptor-related protein 2                      | ENSG00000081479 |
| 206. | MALT1    | - Mucosa-associated lymphoid tissue lymphoma translocation protein 1    | ENSG00000172175 |
| 207. | MANBA    | Beta-mannosidase                                                        | ENSG00000109323 |
| 208. | MAPK1    | Mitogen-activated protein kinase 1                                      | ENSG00000100030 |
| 209. | MBP      | Myelin basic protein                                                    | ENSG00000197971 |
| 210. | MC1R     | Melanocyte-stimulating hormone receptor                                 | ENSG00000258839 |
| 211. | MCTP2    | Multiple C2 and transmembrane domain-containing protein 2;              | ENSG00000140563 |
| 212. | ME3      | NADP-dependent malic enzyme                                             | ENSG00000151376 |
| 213. | MERTK    | Tyrosine-protein kinase Mer                                             | ENSG00000153208 |
| 214. | METTL1   | tRNA (guanine-N(7))-methyltransferase                                   | ENSG00000037897 |
| 215. | MGAT1    | Alpha-1,3-mannosyl-glycoprotein 2-beta-N-acetylglucosaminyltransferase  | ENSG00000131446 |
| 216. | MGAT5    | Alpha-1,6-mannosylglycoprotein 6-beta-N-acetylglucosaminyltransferase A | ENSG00000152127 |
| 217. | MIR1204  |                                                                         | ENSG00000283710 |
| 218. | MIR1208  |                                                                         | ENSG00000221261 |
| 219. | MLANA    | Melanoma antigen recognized by T-cells 1                                | ENSG00000120215 |
| 220. | MMEL1    | Membrane metallo-endopeptidase-like 1                                   | ENSG00000142606 |
| 221. | MMP12    | Macrophage metalloelastase                                              | ENSG00000262406 |
| 222. | MMP2     | 72 kDa type IV collagenase                                              | ENSG00000087245 |
| 223. | MMP9     | Matrix metalloproteinase-9                                              | ENSG00000100985 |
| 224. | MOG      | Myelin-oligodendrocyte glycoprotein                                     | ENSG00000204655 |
| 225. | MPHOSPH9 | M-phase phosphoprotein 9                                                | ENSG00000051825 |
| 226. | MPO      | Myeloperoxidase                                                         | ENSG00000005381 |
| 227. | MPV17L2  | Mpv17-like protein 2                                                    | ENSG00000254858 |
| 228. | MSRA     | Mitochondrial peptide methionine sulfoxide reductase                    | ENSG00000175806 |
| 229. | MTHFR    | Methylenetetrahydrofolate reductase                                     | ENSG00000177000 |
| 230. | MUC21    | Mucin-21                                                                | ENSG00000204544 |
| 231. | MYB      | Transcriptional activator Myb                                           | ENSG00000118513 |

|      |         |                                                                  |                 |
|------|---------|------------------------------------------------------------------|-----------------|
| 232. | MYC     | Myc proto-oncogene protein                                       | ENSG00000136997 |
| 233. | MYH9    | Myosin-9                                                         | ENSG00000100345 |
| 234. | MYLK    | Myosin light chain kinase                                        | ENSG00000065534 |
| 235. | NAT1    | Arylamine N-acetyltransferase 1                                  | ENSG00000171428 |
| 236. | NCK2    | Cytoplasmic protein NCK2                                         | ENSG00000071051 |
| 237. | NFKB1   | Nuclear factor NF-kappa-B p105 subunit                           | ENSG00000109320 |
| 238. | NFKBIL1 | NF-kappa-B inhibitor-like protein 1                              | ENSG00000204498 |
| 239. | NOD2    | Nucleotide-binding oligomerization domain-containing protein 2   | ENSG00000167207 |
| 240. | NOS2a   | Nitric oxide synthase, inducible                                 | ENSG00000007171 |
| 241. | NOTCH4  | Neurogenic locus notch homolog protein 4                         | ENSG00000204301 |
| 242. | NPHS2   | Podocin                                                          | ENSG00000116218 |
| 243. | NPR1    | Atrial natriuretic peptide receptor 1                            | ENSG00000169418 |
| 244. | NQO1    | NAD(P)H dehydrogenase [quinone] 1                                | ENSG00000181019 |
| 245. | NRXN1   | Neurexin-1                                                       | ENSG00000179915 |
| 246. | OAS1    | 2'-5'-oligoadenylate synthase 1                                  | ENSG00000089127 |
| 247. | OLIG3   | Oligodendrocyte transcription factor 3                           | ENSG00000177468 |
| 248. | OPCML   | Opioid-binding protein/cell adhesion molecule                    | ENSG00000183715 |
| 249. | OPN     | Osteopontin; Binds tightly to hydroxyapatite                     | ENSG00000118785 |
| 250. | OR51B6  | Olfactory receptor 51B6                                          | ENSG00000176239 |
| 251. | OR51I1  | Olfactory receptor 51I1                                          | ENSG00000167359 |
| 252. | OR51M1  | Olfactory receptor 51M1                                          | ENSG00000184698 |
| 253. | P2RX4   | P2X purinoceptor 4                                               | ENSG00000135124 |
| 254. | P2X7    | P2X purinoceptor 7                                               | ENSG00000089041 |
| 255. | p53     | Cellular tumor antigen p53                                       | ENSG00000141510 |
| 256. | PAI     | Plasminogen activator inhibitor 1                                | ENSG00000106366 |
| 257. | PARK2   | E3 ubiquitin-protein ligase parkin;                              | ENSG00000185345 |
| 258. | PCDH10  | Protocadherin-10                                                 | ENSG00000138650 |
| 259. | PDCD1   | Programmed cell death protein 1                                  | ENSG00000188389 |
| 260. | PDE4B   | cAMP-specific 3',5'-cyclic phosphodiesterase 4B                  | ENSG00000184588 |
| 261. | PDE4D   | cAMP-specific 3',5'-cyclic phosphodiesterase 4D                  | ENSG00000113448 |
| 262. | PDE6A   | Rod cGMP-specific 3',5'-cyclic phosphodiesterase subunit alpha   | ENSG00000132915 |
| 263. | PDZD8   | PDZ domain-containing protein 8                                  | ENSG00000165650 |
| 264. | PDZRN4  | PDZ domain-containing ring finger 4                              | ENSG00000165966 |
| 265. | PECAM1  | Platelet endothelial cell adhesion molecule                      | ENSG00000261371 |
| 266. | PIP5K3  | 1-phosphatidylinositol 3-phosphate 5-kinase                      | ENSG00000115020 |
| 267. | PITPNM2 | Membrane-associated phosphatidylinositol transfer protein 2      | ENSG00000090975 |
| 268. | PLCβ1   | 1-phosphatidylinositol 4,5-bisphosphate phosphodiesterase beta-1 | ENSG00000182621 |



|      |               |                                                                          |                 |
|------|---------------|--------------------------------------------------------------------------|-----------------|
| 269. | PLC $\beta$ 4 | 1-phosphatidylinositol 4,5-bisphosphate phosphodiesterase beta-4         | ENSG00000101333 |
| 270. | PLEK          | Pleckstrin                                                               | ENSG00000115956 |
| 271. | POU2AF1       | POU domain class 2-associating factor 1                                  | ENSG00000110777 |
| 272. | POU2F3        | POU domain, class 2, transcription factor 3                              | ENSG00000137709 |
| 273. | POU5F1        | POU domain, class 5, transcription factor 1                              | ENSG00000204531 |
| 274. | PPAR $\gamma$ | Peroxisome proliferator-activated receptor gamma                         | ENSG00000132170 |
| 275. | PPFIBP1       | Liprin-beta-1                                                            | ENSG00000110841 |
| 276. | PRKAR1A       | cAMP-dependent protein kinase type I-<br>alpha regulatory subunit        | ENSG00000108946 |
| 277. | PRKCA         | Protein kinase C alpha type                                              | ENSG00000154229 |
| 278. | PSCD1         | Cytohesin-1                                                              | ENSG00000108669 |
| 279. | PSGL-1        | P-selectin glycoprotein ligand 1                                         | ENSG00000110876 |
| 280. | PSMB9         | Proteasome subunit beta type-9                                           | ENSG00000240065 |
| 281. | PSORS1C1      | Psoriasis susceptibility 1 candidate 1                                   | ENSG00000204540 |
| 282. | PTEN          | Phosphatase and tensin homolog                                           | ENSG00000171862 |
| 283. | PTGER4        | Prostaglandin E2 receptor EP4 subtype                                    | ENSG00000171522 |
| 284. | PTK2          | Focal adhesion kinase 1                                                  | ENSG00000169398 |
| 285. | PTPN22        | Tyrosine-protein phosphatase non-receptor<br>type 22                     | ENSG00000134242 |
| 286. | RAB38         | Ras-related protein Rab-38                                               | ENSG00000123892 |
| 287. | RAGE          | Advanced glycosylation end product-<br>specific receptor                 | ENSG00000204305 |
| 288. | RASD2         | GTP-binding protein Rhes;                                                | ENSG00000100302 |
| 289. | RASGRP3       | Ras guanyl-releasing protein 3                                           | ENSG00000152689 |
| 290. | RASSF8        | Ras association domain family member 8                                   | ENSG00000123094 |
| 291. | REL           | Proto-oncogene c-Rel;                                                    | ENSG00000162924 |
| 292. | RELN          | Reelin                                                                   | ENSG00000189056 |
| 293. | RGR           | RPE-retinal G protein-coupled receptor                                   | ENSG00000148604 |
| 294. | RGS1          | Regulator of G-protein signalling 1                                      | ENSG00000090104 |
| 295. | RORA          | Nuclear receptor ROR-alpha                                               | ENSG00000069667 |
| 296. | RPL5          | 60S ribosomal protein L5                                                 | ENSG00000122406 |
| 297. | RPS6KB1       | Ribosomal protein S6 kinase beta-1                                       | ENSG00000108443 |
| 298. | SCIN          | Adseverin                                                                | ENSG00000006747 |
| 299. | SCN10A        | Sodium channel protein type 10 subunit<br>alpha                          | ENSG00000185313 |
| 300. | SCN2B         | Sodium channel subunit beta-2                                            | ENSG00000149575 |
| 301. | SCO2          | Protein SCO2 homolog, mitochondrial                                      | ENSG00000130489 |
| 302. | SELE          | E-selectin; Cell-surface glycoprotein having a<br>role in immunoadhesion | ENSG00000007908 |
| 303. | SH2D2A        | SH2 domain-containing protein 2A                                         | ENSG00000027869 |
| 304. | SH3GL2        | Endophilin-A1                                                            | ENSG00000107295 |
| 305. | SLC11A1       | Natural resistance-associated macrophage<br>protein 1                    | ENSG00000018280 |

|      |                |                                                       |                 |
|------|----------------|-------------------------------------------------------|-----------------|
| 306. | SLC25A36       | Solute carrier family 25 member 36                    | ENSG00000114120 |
| 307. | SLC6A6         | Sodium- and chloride-dependent taurine transporter    | ENSG00000131389 |
| 308. | SLC7A5         | Large neutral amino acids transporter small subunit 1 | ENSG00000103257 |
| 309. | SLIT2          | Slit homolog 2 protein                                | ENSG00000145147 |
| 310. | SOCS1          | Suppressor of cytokine signalling 1                   | ENSG00000185338 |
| 311. | SOX8           | Transcription factor SOX-8                            | ENSG00000005513 |
| 312. | SP140          | Nuclear body protein SP140                            | ENSG00000079263 |
| 313. | SPRY2          | Protein sprouty homolog 2                             | ENSG00000136158 |
| 314. | SPSB1          | SPRY domain-containing SOCS box protein 1             | ENSG00000171621 |
| 315. | ST8SIA1        | Alpha-N-acetylneuraminide alpha-2,8-sialyltransferase | ENSG00000111728 |
| 316. | STAT3          | Signal transducer and activator of transcription 3    | ENSG00000168610 |
| 317. | STAT4          | Signal transducer and activator of transcription 4    | ENSG00000138378 |
| 318. | SYN3           | Synapsin-3                                            | ENSG00000185666 |
| 319. | TAC1           | Protachykinin-1                                       | ENSG00000006128 |
| 320. | TAGAP          | T-cell activation Rho GTPase-activating protein       | ENSG00000164691 |
| 321. | TAP1           | Antigen peptide transporter 1                         | ENSG00000168394 |
| 322. | TAP2           | Antigen peptide transporter 2                         | ENSG00000204267 |
| 323. | TBKBP1         | TANK-binding kinase 1-binding protein 1               | ENSG00000198933 |
| 324. | TBX21          | T-box transcription factor TBX21                      | ENSG00000073861 |
| 325. | TCF19          | Transcription factor 19                               | ENSG00000137310 |
| 326. | TEC            | Tyrosine-protein kinase Tec                           | ENSG00000135605 |
| 327. | TGF- $\beta$   | Transforming growth factor beta-1                     | ENSG00000105329 |
| 328. | TGF- $\beta$ 2 | Transforming growth factor beta-2                     | ENSG00000092969 |
| 329. | THEMIS         | Protein THEMIS                                        | ENSG00000172673 |
| 330. | TIMMDC1        | Complex I assembly factor TIMMDC1                     | ENSG00000113845 |
| 331. | TLR2           | Toll-like receptor 2                                  | ENSG00000137462 |
| 332. | TM4SF4         | Transmembrane 4 L6 family member 4                    | ENSG00000169903 |
| 333. | TMEM39A        | Transmembrane protein 39A                             | ENSG00000176142 |
| 334. | TNFA           | Tumor necrosis factor                                 | ENSG00000232810 |
| 335. | TNFAIP3        | Tumor necrosis factor alpha-induced protein 3         | ENSG00000118503 |
| 336. | TNFR2          | Tumor necrosis factor receptor superfamily member 1B  | ENSG00000028137 |
| 337. | TNFRSF10A      | Tumor necrosis factor receptor superfamily member 10A | ENSG00000104689 |
| 338. | TNFRSF1A       | Tumor necrosis factor receptor superfamily member 1A  | ENSG00000067182 |
| 339. | TNFRSF6B       | Tumor necrosis factor receptor superfamily            | ENSG00000243509 |

|      |             |                                                    |                 |
|------|-------------|----------------------------------------------------|-----------------|
| 340. | TNFSF14     | Tumor necrosis factor ligand superfamily member 14 | ENSG00000125735 |
| 341. | TNF $\beta$ | Lymphotoxin-alpha                                  | ENSG00000226979 |
| 342. | TNXB        | Tenascin-X                                         | ENSG00000168477 |
| 343. | TPA         | Tissue-type plasminogen activator                  | ENSG00000104368 |
| 344. | TPBG        | Trophoblast glycoprotein                           | ENSG00000146242 |
| 345. | TRAF3       | TNF receptor-associated factor 3                   | ENSG00000131323 |
| 346. | TRAIL       | Tumor necrosis factor ligand superfamily member 10 | ENSG00000121858 |
| 347. | TSMF        | Elongation factor Ts, mitochondrial                | ENSG00000123297 |
| 348. | TYK2        | Non-receptor tyrosine-protein kinase TYK2          | ENSG00000105397 |
| 349. | UBE1DC1     | Ubiquitin-like modifier-activating enzyme 5        | ENSG00000081307 |
| 350. | UBE4A       | Ubiquitin conjugation factor E4 A                  | ENSG00000110344 |
| 351. | UCP2        | Mitochondrial uncoupling protein 2                 | ENSG00000175567 |
| 352. | VAV2        | Guanine nucleotide exchange factor VAV2            | ENSG00000160293 |
| 353. | VCAM1       | Vascular cell adhesion protein 1                   | ENSG00000162692 |
| 354. | VDR         | Vitamin D3 receptor                                | ENSG00000111424 |
| 355. | VIP         | VIP peptides                                       | ENSG00000146469 |
| 356. | VMP1        | Vacuole membrane protein 1                         | ENSG00000062716 |
| 357. | ZBTB46      | Zinc finger and BTB domain-containing protein 46   | ENSG00000130584 |
| 358. | ZC2HC1A     | Zinc finger C2HC-type containing 1A                | ENSG00000104427 |
| 359. | ZFP36L1     | mRNA decay activator protein ZFP36L1               | ENSG00000185650 |
| 360. | ZIC1        | Zinc finger protein ZIC 1                          | ENSG00000152977 |
| 361. | ZMIZ1       | Zinc finger MIZ domain-containing protein 1        | ENSG00000108175 |
| 362. | ZNF433      | Zinc finger protein 433                            | ENSG00000197647 |
| 363. | ZNF746      | Zinc finger protein 746                            | ENSG00000181220 |
| 364. | ADAD1       | Adenosine deaminase domain containing 1            | ENSG00000164113 |
| 365. | ADRB2       | Adrenoceptor beta 2                                | ENSG00000169252 |
| 366. | AKT3        | AKT serine/threonine kinase 3                      | ENSG00000117020 |
| 367. | APEX1       | Apurinic/apyrimidinic endodeoxyribonuclease 1      | ENSG00000100823 |
| 368. | APEX2       | Apurinic/apyrimidinic endodeoxyribonuclease 2      | ENSG00000169188 |
| 369. | APOC2       | Apolipoprotein C2                                  | ENSG00000234906 |
| 370. | ATXN2       | Ataxin 2                                           | ENSG00000204842 |
| 371. | AXDND1      | Axonemal dynein light chain domain containing 1    | ENSG00000162779 |
| 372. | BAG6        | BAG cochaperone 6                                  | ENSG00000204463 |
| 373. | BICD1       | BICD cargo adaptor 1                               | ENSG00000151746 |
| 374. | BRCA1       | BRCA1 DNA repair associated                        | ENSG00000012048 |
| 375. | BRCA2       | BRCA2 DNA repair associated                        | ENSG00000139618 |
| 376. | C2          | Complement C2                                      | ENSG00000166278 |

|      |         |                                                         |                 |
|------|---------|---------------------------------------------------------|-----------------|
| 377. | C7      | Complement C7                                           | ENSG00000112936 |
| 378. | CACNG4  | Calcium voltage-gated channel auxiliary subunit gamma 4 | ENSG00000075461 |
| 379. | CASP10  | Caspase 10                                              | ENSG00000003400 |
| 380. | CASP2   | Caspase 2                                               | ENSG00000106144 |
| 381. | CASP3   | Caspase 3                                               | ENSG00000164305 |
| 382. | CASP5   | Caspase 5                                               | ENSG00000137757 |
| 383. | CASP7   | Caspase 7                                               | ENSG00000165806 |
| 384. | CASP8   | Caspase 8                                               | ENSG00000064012 |
| 385. | CASP9   | Caspase 9                                               | ENSG00000132906 |
| 386. | CCL1    | C-C motif chemokine ligand 1                            | ENSG00000108702 |
| 387. | CCL11   | C-C motif chemokine ligand 11                           | ENSG00000172156 |
| 388. | CCL13   | C-C motif chemokine ligand 13                           | ENSG00000181374 |
| 389. | CCL17   | C-C motif chemokine ligand 17                           | ENSG00000102970 |
| 390. | CCL2    | C-C motif chemokine ligand 2                            | ENSG00000108691 |
| 391. | CCL22   | C-C motif chemokine ligand 22                           | ENSG00000102962 |
| 392. | CCL7    | C-C motif chemokine ligand 7                            | ENSG00000108688 |
| 393. | CCL8    | C-C motif chemokine ligand 8                            | ENSG00000108700 |
| 394. | CCNH    | Cyclin H                                                | ENSG00000134480 |
| 395. | CCR1    | C-C motif chemokine receptor 1                          | ENSG00000163823 |
| 396. | CCR2    | C-C motif chemokine receptor 2                          | ENSG00000121807 |
| 397. | CD1A    | CD1a molecule                                           | ENSG00000158477 |
| 398. | CD1E    | CD1e molecule                                           | ENSG00000158488 |
| 399. | CD24    | CD24 molecule                                           | ENSG00000272398 |
| 400. | CD274   | CD274 molecule                                          | ENSG00000120217 |
| 401. | CDK7    | Cyclin dependent kinase 7                               | ENSG00000134058 |
| 402. | CDSN    | Corneodesmosin                                          | ENSG00000204539 |
| 403. | CEP112  | Centrosomal protein 112                                 | ENSG00000154240 |
| 404. | CEP170  | Centrosomal protein 170                                 | ENSG00000143702 |
| 405. | CFB     | Complement factor B                                     | ENSG00000243649 |
| 406. | CFLAR   | CASP8 and FADD like apoptosis regulator                 | ENSG00000003402 |
| 407. | CHML    | CHM like Rab escort protein                             | ENSG00000203668 |
| 408. | CHRM2   | Cholinergic receptor muscarinic 2                       | ENSG00000181072 |
| 409. | COMT    | Catechol-O-methyltransferase                            | ENSG00000093010 |
| 410. | CTSS    | Cathepsin S                                             | ENSG00000163131 |
| 411. | CYP2D6  | Cytochrome P450 family 2 subfamily D member 6           | ENSG00000100197 |
| 412. | CYP2R1  | Cytochrome P450 family 2 subfamily R member 1           | ENSG00000186104 |
| 413. | DBH     | Dopamine beta-hydroxylase                               | ENSG00000123454 |
| 414. | DBP     | D-box binding PAR bZIP transcription factor             | ENSG00000105516 |
| 415. | DCHS2   | Dachsous cadherin-related 2                             | ENSG00000197410 |
| 416. | DCLRE1C | DNA cross-link repair 1C                                | ENSG00000152457 |
| 417. | DCTN1   | Dynactin subunit 1                                      | ENSG00000204843 |
| 418. | DDB2    | Damage specific DNA binding protein 2                   | ENSG00000134574 |

|      |        |                                                              |                 |
|------|--------|--------------------------------------------------------------|-----------------|
| 419. | DDX58  | DExD/H-box helicase 58                                       | ENSG00000107201 |
| 420. | DRD3   | Dopamine receptor D3                                         | ENSG00000151577 |
| 421. | DUSP1  | Dual specificity phosphatase 1                               | ENSG00000120129 |
| 422. | EBF1   | EBF transcription factor 1                                   | ENSG00000164330 |
| 423. | ECE2   | Endothelin converting enzyme 2                               | ENSG00000145194 |
| 424. | EME1   | Essential meiotic structure-specific endonuclease 1          | ENSG00000154920 |
| 425. | ERBB3  | Erb-b2 receptor tyrosine kinase 3                            | ENSG00000065361 |
| 426. | ERCC1  | ERCC excision repair 1, endonuclease non-catalytic subunit   | ENSG00000012061 |
| 427. | ERCC2  | ERCC excision repair 2, TFIIH core complex helicase subunit  | ENSG00000104884 |
| 428. | ERCC3  | ERCC excision repair 3, TFIIH core complex helicase subunit  | ENSG00000163161 |
| 429. | ERCC4  | ERCC excision repair 4, endonuclease catalytic subunit       | ENSG00000175595 |
| 430. | ERCC5  | ERCC excision repair 5, endonuclease                         | ENSG00000134899 |
| 431. | ERCC6  | ERCC excision repair 6, chromatin remodeling factor          | ENSG00000225830 |
| 432. | ERCC8  | ERCC excision repair 8, CSA ubiquitin ligase complex subunit | ENSG00000049167 |
| 433. | EXO1   | Exonuclease 1                                                | ENSG00000174371 |
| 434. | FAM69A | Divergent protein kinase domain 1A                           | ENSG00000154511 |
| 435. | FASLG  | Fas ligand                                                   | ENSG00000117560 |
| 436. | FEN1   | Flap structure-specific endonuclease 1                       | ENSG00000168496 |
| 437. | FH     | Fumarate hydratase                                           | ENSG00000091483 |
| 438. | FLOT1  | Flotillin 1                                                  | ENSG00000137312 |
| 439. | FMN2   | Formin 2                                                     | ENSG00000155816 |
| 440. | GABBR1 | Gamma-aminobutyric acid type B receptor subunit 1            | ENSG00000204681 |
| 441. | GABRA3 | Gamma-aminobutyric acid type A receptor subunit alpha3       | ENSG00000011677 |
| 442. | GBP1   | Guanylate binding protein 1                                  | ENSG00000117228 |
| 443. | GIPR   | Gastric inhibitory polypeptide receptor                      | ENSG00000010310 |
| 444. | GNB3   | G protein subunit beta 3                                     | ENSG00000111664 |
| 445. | GPC6   | Glypican 6                                                   | ENSG00000183098 |
| 446. | GREM2  | Gremlin 2, DAN family BMP antagonist                         | ENSG00000180875 |
| 447. | GSTM1  | Glutathione S-transferase mu 1                               | ENSG00000134184 |
| 448. | GSTT1  | Glutathione S-transferase theta 1                            | ENSG00000277656 |
| 449. | GTF2H1 | General transcription factor IIH subunit 1                   | ENSG00000110768 |
| 450. | GTF2H4 | General transcription factor IIH subunit 4                   | ENSG00000213780 |
| 451. | GTF2H5 | General transcription factor IIH subunit 5                   | ENSG00000272047 |
| 452. | H6PD   | Hexose-6-phosphate dehydrogenase/glucose 1-dehydrogenase     | ENSG00000049239 |
| 453. | HAVCR1 | Hepatitis A virus cellular receptor 1                        | ENSG00000113249 |
| 454. | HCG4   | HLA complex group 4                                          | ENSG00000176998 |
| 455. | HCG4P8 | HLA complex group 4 pseudogene 8                             | ENSG00000229142 |

|      |          |                                                                                       |                 |
|------|----------|---------------------------------------------------------------------------------------|-----------------|
| 456. | HCG9     | HLA complex group 9                                                                   | ENSG00000204625 |
| 457. | HELZ     | Helicase with zinc finger                                                             | ENSG00000198265 |
| 458. | HFE      | Homeostatic iron regulator                                                            | ENSG00000010704 |
| 459. | HLA-C    | Major histocompatibility complex, class I, C                                          | ENSG00000204525 |
| 460. | HLA-DQB1 | Major histocompatibility complex, class II, DQ beta 1                                 | ENSG00000179344 |
| 461. | HLA-DRB1 | Major histocompatibility complex, class II, DR beta 1                                 | ENSG00000196126 |
| 462. | HLA-J    | Major histocompatibility complex, class I, J                                          | ENSG00000204622 |
| 463. | HNMT     | Histamine N-methyltransferase                                                         | ENSG00000150540 |
| 464. | HSPB2    | Heat shock protein family B (small) member 2                                          | ENSG00000170276 |
| 465. | IDO1     | Indoleamine 2,3-dioxygenase 1                                                         | ENSG00000131203 |
| 466. | IFNA17   | Interferon alpha 17                                                                   | ENSG00000234829 |
| 467. | IGHV4-28 | Immunoglobulin heavy variable 4-28                                                    | ENSG00000211952 |
| 468. | IL12A    | Interleukin 12A                                                                       | ENSG00000168811 |
| 469. | IL12RB2  | Interleukin 12 receptor subunit beta 2                                                | ENSG00000081985 |
| 470. | IL18R1   | Interleukin 18 receptor 1 [                                                           | ENSG00000115604 |
| 471. | IL1B     | Interleukin 1 beta                                                                    | ENSG00000125538 |
| 472. | IL21     | Interleukin 21                                                                        | ENSG00000138684 |
| 473. | IL21R    | Interleukin 21 receptor                                                               | ENSG00000103522 |
| 474. | IL26     | Interleukin 26                                                                        | ENSG00000111536 |
| 475. | IL2RA    | Interleukin 2 receptor subunit alpha                                                  | ENSG00000134460 |
| 476. | IRF4     | Interferon regulatory factor 4                                                        | ENSG00000137265 |
| 477. | IRF9     | Interferon regulatory factor 9                                                        | ENSG00000213928 |
| 478. | JAK1     | Janus kinase 1                                                                        | ENSG00000162434 |
| 479. | JAK2     | Janus kinase 2                                                                        | ENSG00000096968 |
| 480. | KCNIP1   | Potassium voltage-gated channel interacting protein 1                                 | ENSG00000182132 |
| 481. | KIF5A    | Kinesin family member 5A                                                              | ENSG00000155980 |
| 482. | KIR2DL1  | Killer cell immunoglobulin like receptor, two Ig domains and long cytoplasmic tail 1  | ENSG00000125498 |
| 483. | KIR2DL2  | Killer cell immunoglobulin like receptor, two Ig domains and long cytoplasmic tail 2  | ENSG00000275960 |
| 484. | KIR2DL3  | Killer cell immunoglobulin like receptor, two Ig domains and long cytoplasmic tail 3  | ENSG00000243772 |
| 485. | KIR2DL4  | Killer cell immunoglobulin like receptor, two Ig domains and long cytoplasmic tail 4  | ENSG00000189013 |
| 486. | KIR2DL5A | Killer cell immunoglobulin like receptor, two Ig domains and long cytoplasmic tail 5A | ENSG00000278116 |
| 487. | KIR2DP1  | Killer cell immunoglobulin like receptor, two Ig domains pseudogene 1                 | ENSG00000242473 |
| 488. | KIR2DS1  | Killer cell immunoglobulin like receptor, two Ig domains and short cytoplasmic tail 1 | ENSG00000276327 |
| 489. | KIR2DS2  | Killer cell immunoglobulin like receptor, two Ig domains and short cytoplasmic tail 2 | ENSG00000275452 |
| 490. | KIR2DS3  | Killer cell immunoglobulin like receptor, two Ig domains and short cytoplasmic tail 3 | ENSG00000278306 |

|      |          |                                                                                         |                    |
|------|----------|-----------------------------------------------------------------------------------------|--------------------|
| 491. | KIR2DS4  | Killer cell immunoglobulin like receptor, two Ig domains and short cytoplasmic tail 4   | ENSG00000221957    |
| 492. | KIR2DS5  | Killer cell immunoglobulin like receptor, two Ig domains and short cytoplasmic tail 5   | ENSG00000288206    |
| 493. | KIR3DL1  | Killer cell immunoglobulin like receptor, three Ig domains and long cytoplasmic tail 1  | ENSG00000167633    |
| 494. | KIR3DL2  | Killer cell immunoglobulin like receptor, three Ig domains and long cytoplasmic tail 2  | ENSG00000240403    |
| 495. | KIR3DL3  | Killer cell immunoglobulin like receptor, three Ig domains and long cytoplasmic tail 3  | ENSG00000242019    |
| 496. | KIR3DS1  | Killer cell immunoglobulin like receptor, three Ig domains and short cytoplasmic tail 1 | ENSG00000275434    |
| 497. | KMO      | Kynurenine 3-monooxygenase                                                              | ENSG00000117009    |
| 498. | LEKR1    | Leucine, glutamate and lysine rich 1                                                    | ENSG00000197980    |
| 499. | LEP      | Leptin                                                                                  | ENSG00000174697    |
| 500. | LIF      | LIF interleukin 6 family cytokine                                                       | ENSG00000128342    |
| 501. | LIG3     | DNA ligase 3                                                                            | ENSG00000005156    |
| 502. | LIG4     | DNA ligase 4                                                                            | ENSG00000174405    |
| 503. | LILRA3   | Leukocyte immunoglobulin like receptor A3                                               | ENSG00000275841    |
| 504. | LMNB1    | Lamin B1                                                                                | ENSG00000113368    |
| 505. | LTA      | Lymphotoxin alpha                                                                       | ENSG00000226979    |
| 506. | MBD4     | Methyl-CpG binding domain 4                                                             | ENSG00000129071    |
| 507. | MCCD1    | Mitochondrial coiled-coil domain 1                                                      | ENSG00000204511    |
| 508. | MEFV     | MEFV innate immunity regulator, pyrin                                                   | ENSG00000103313    |
| 509. | MET      | MET proto-oncogene, receptor tyrosine kinase                                            | ENSG00000105976    |
| 510. | MGC45800 |                                                                                         | ENSG00000177822    |
| 511. | MICA     | MHC class I polypeptide-related sequence A                                              | ENSG00000204520    |
| 512. | MICB     | MHC class I polypeptide-related sequence B                                              | ENSG00000204516    |
| 513. | MICD     | MHC class I polypeptide-related sequence D (pseudogene)                                 | ENSG00000229390    |
| 514. | MIF      | Macrophage migration inhibitory factor                                                  | ENSG00000240972    |
| 515. | MMP1     | Matrix metalloproteinase 1                                                              | ENSG00000196611    |
| 516. | MMP3     | Matrix metalloproteinase 3                                                              | ENSG00000149968    |
| 517. | MMS19    | MMS19 homolog, cytosolic iron-sulfur assembly component                                 | ENSG00000155229    |
| 518. | MNAT1    | MNAT1 component of CDK activating kinase                                                | ENSG0000020426     |
| 519. | MPG      | N-methylpurine DNA glycosylase                                                          | ENSG00000103152    |
| 520. | MRE11A   | MRE11A homolog A, double strand break repair nuclease                                   | ENSMUSG00000031928 |
| 521. | MROH2B   | Maestro heat like repeat family member 2B                                               | ENSG00000171495    |
| 522. | MT-ND5   | Mitochondrially encoded NADH:ubiquinone oxidoreductase core subunit 5                   | ENSG00000198786    |
| 523. | MTRR     | 5-methyltetrahydrofolate-homocysteine methyltransferase reductase                       | ENSG00000124275    |

|      |         |                                                        |                 |
|------|---------|--------------------------------------------------------|-----------------|
| 524. | MUS81   | MUS81 structure-specific endonuclease subunit          | ENSG00000172732 |
| 525. | MUTYH   | MutY DNA glycosylase                                   | ENSG00000132781 |
| 526. | MXI1    | MAX interactor 1, dimerization protein                 | ENSG00000119950 |
| 527. | MYNN    | Myoneurin                                              | ENSG00000085274 |
| 528. | MYO9B   | Myosin IXB                                             | ENSG00000099331 |
| 529. | NBN     | Nibrin                                                 | ENSG00000104320 |
| 530. | NCKAP5  | NCK associated protein 5                               | ENSG00000176771 |
| 531. | NDFIP1  | Nedd4 family interacting protein 1                     | ENSG00000131507 |
| 532. | NDUFS2  | NADH:ubiquinone oxidoreductase core subunit S2         | ENSG00000158864 |
| 533. | NEIL1   | Nei like DNA glycosylase 1                             | ENSG00000140398 |
| 534. | NEIL2   | Nei like DNA glycosylase 2                             | ENSG00000154328 |
| 535. | NELFE   | Negative elongation factor complex member E            | ENSG00000204356 |
| 536. | NGF     | Nerve growth factor                                    | ENSG00000134259 |
| 537. | NHEJ1   | Non-homologous end joining factor 1                    | ENSG00000187736 |
| 538. | NLRP11  | NLR family pyrin domain containing 11                  | ENSG00000179873 |
| 539. | NOD1    | Nucleotide binding oligomerization domain containing 1 | ENSG00000106100 |
| 540. | NOS1    | Nitric oxide synthase 1                                | ENSG00000089250 |
| 541. | NOS2P1  | Nitric oxide synthase 2 pseudogene 1                   | ENSG00000265788 |
| 542. | NOS2P2  | Nitric oxide synthase 2 pseudogene 2                   | ENSG00000167494 |
| 543. | NOS3    | Nitric oxide synthase 3                                | ENSG00000164867 |
| 544. | NR3C1   | Nuclear receptor subfamily 3 group C member 1          | ENSG00000113580 |
| 545. | NTHL1   | Nth like DNA glycosylase 1                             | ENSG00000065057 |
| 546. | ODF3B   | Outer dense fiber of sperm tails 3B                    | ENSG00000177989 |
| 547. | OGG1    | 8-oxoguanine DNA glycosylase                           | ENSG00000114026 |
| 548. | OPN3    | Opsin 3                                                | ENSG00000054277 |
| 549. | OR12D3  | Olfactory receptor family 12 subfamily D member 3      | ENSG00000112462 |
| 550. | OR2H1   | Olfactory receptor family 2 subfamily H member 1       | ENSG00000204688 |
| 551. | OR2H2   | Olfactory receptor family 2 subfamily H member 2       | ENSG00000204657 |
| 552. | PARP1   | Poly(ADP-ribose) polymerase 1                          | ENSG00000143799 |
| 553. | PARP2   | Poly(ADP-ribose) polymerase 2                          | ENSG00000129484 |
| 554. | PCNA    | Proliferating cell nuclear antigen                     | ENSG00000132646 |
| 555. | PCSK5   | Proprotein convertase subtilisin/kexin type 5          | ENSG00000099139 |
| 556. | PHACTR2 | Phosphatase and actin regulator 2                      | ENSG00000112419 |
| 557. | PIAS1   | Protein inhibitor of activated STAT 1                  | ENSG00000033800 |
| 558. | PLAU    | Plasminogen activator, urokinase                       | ENSG00000122861 |
| 559. | PLD5    | Phospholipase D family member 5                        | ENSG00000180287 |
| 560. | PNKP    | Polynucleotide kinase 3,-phosphatase                   | ENSG00000039650 |
| 561. | PNMT    | Phenylethanolamine N-methyltransferase                 | ENSG00000141744 |



|      |         |                                                                   |                 |
|------|---------|-------------------------------------------------------------------|-----------------|
| 562. | PNPT1   | Polyribonucleotide nucleotidyltransferase 1                       | ENSG00000138035 |
| 563. | POLB    | DNA polymerase beta                                               | ENSG00000070501 |
| 564. | POLD1   | DNA polymerase delta 1, catalytic subunit                         | ENSG00000062822 |
| 565. | POLE    | DNA polymerase epsilon, catalytic subunit                         | ENSG00000177084 |
| 566. | POLG    | DNA polymerase gamma, catalytic subunit                           | ENSG00000140521 |
| 567. | PON1    | Paraoxonase 1                                                     | ENSG00000005421 |
| 568. | POPDC3  | Popeye domain containing 3                                        | ENSG00000132429 |
| 569. | PPARA   | Peroxisome proliferator activated receptor<br>alpha               | ENSG00000186951 |
| 570. | PPARG   | Peroxisome proliferator activated receptor<br>gamma               | ENSG00000132170 |
| 571. | PPP1R11 | Protein phosphatase 1 regulatory inhibitor<br>subunit 11          | ENSG00000204619 |
| 572. | PRF1    | Perforin 1                                                        | ENSG00000180644 |
| 573. | PRKDC   | Protein kinase, DNA-activated, catalytic<br>subunit               | ENSG00000253729 |
| 574. | PRKRA   | Protein activator of interferon induced<br>protein kinase EIF2AK2 | ENSG00000180228 |
| 575. | PRNP    | Prion protein                                                     | ENSG00000171867 |
| 576. | PSMD2   | Proteasome 26S subunit, non-ATPase 2                              | ENSG00000175166 |
| 577. | PTAFR   | Platelet activating factor receptor                               | ENSG00000169403 |
| 578. | PTPRA   | Protein tyrosine phosphatase receptor type<br>A                   | ENSG00000132670 |
| 579. | PTPRC   | Protein tyrosine phosphatase receptor type C                      | ENSG00000081237 |
| 580. | PVR     | PVR cell adhesion molecule                                        | ENSG00000073008 |
| 581. | PVRL2   | Novel transcript, antisense to PVRL2                              | ENSG00000267282 |
| 582. | RAD21L1 | RAD21 cohesin complex component like 1                            | ENSG00000244588 |
| 583. | RAD23A  | RAD23 homolog A, nucleotide excision<br>repair protein            | ENSG00000179262 |
| 584. | RAD23B  | RAD23 homolog B, nucleotide excision<br>repair protein            | ENSG00000119318 |
| 585. | RAD51   | RAD51 recombinase                                                 | ENSG00000051180 |
| 586. | RAD51B  | RAD51 paralog B                                                   | ENSG00000182185 |
| 587. | RAD51C  | RAD51 paralog C                                                   | ENSG00000108384 |
| 588. | RAD51D  | RAD51 paralog D                                                   | ENSG00000185379 |
| 589. | RAD52   | RAD52 homolog, DNA repair protein                                 | ENSG00000002016 |
| 590. | RAD54B  | RAD54 homolog B                                                   | ENSG00000197275 |
| 591. | RAD54L  | RAD54 like                                                        | ENSG00000085999 |
| 592. | RFC1    | Replication factor C subunit 1                                    | ENSG00000035928 |
| 593. | RFC2    | Replication factor C subunit 2                                    | ENSG00000049541 |
| 594. | RFC4    | Replication factor C subunit 4                                    | ENSG00000163918 |
| 595. | RFC5    | Replication factor C subunit 5                                    | ENSG00000111445 |
| 596. | RGMA    | Repulsive guidance molecule BMP co-<br>receptor a                 | ENSG00000182175 |
| 597. | RGS14   | Regulator of G protein signaling 14                               | ENSG00000169220 |
| 598. | RGS2    | Regulator of G protein signaling 2                                | ENSG00000116741 |
| 599. | RGS7    | Regulator of G protein signaling 7                                | ENSG00000182901 |

|      |          |                                                                    |                 |
|------|----------|--------------------------------------------------------------------|-----------------|
| 600. | RNF39    | Ring finger protein 39                                             | ENSG00000204618 |
| 601. | RPA1     | Replication protein A1                                             | ENSG00000132383 |
| 602. | RPA2     | Replication protein A2                                             | ENSG00000117748 |
| 603. | RPA3     | Replication protein A3                                             | ENSG00000106399 |
| 604. | RYR2     | Ryanodine receptor 2                                               | ENSG00000198626 |
| 605. | SAE1     | SUMO1 activating enzyme subunit 1                                  | ENSG00000142230 |
| 606. | SDCCAG8  | SHH signaling and ciliogenesis regulator<br>SDCCAG8                | ENSG00000054282 |
| 607. | SELL     | Selectin L                                                         | ENSG00000188404 |
| 608. | SELP     | Selectin P                                                         | ENSG00000174175 |
| 609. | SH2B3    | SH2B adaptor protein 3                                             | ENSG00000111252 |
| 610. | SLC15A2  | Solute carrier family 15 member 2                                  | ENSG00000163406 |
| 611. | SLC25A27 | Solute Carrier Family 25 Member 27                                 | ENSG00000153291 |
| 612. | SLC30A7  | Solute Carrier Family 30 Member 7                                  | ENSG00000162695 |
| 613. | SLC44A4  | Solute Carrier Family 44 Member 4                                  | ENSG00000204385 |
| 614. | SMUG1    | Single-Strand-Selective Monofunctional<br>Uracil-DNA Glycosylase 1 | ENSG00000123415 |
| 615. | SPARCL1  | SPARC Like 1                                                       | ENSG00000152583 |
| 616. | SPEF2    | Sperm Flagellar 2                                                  | ENSG00000152582 |
| 617. | STAT1    | Signal Transducer And Activator Of<br>Transcription 1              | ENSG00000115415 |
| 618. | STAU2    | Staufen Double-Stranded RNA Binding<br>Protein 2                   | ENSG00000040341 |
| 619. | STMN1    | Stathmin 1                                                         | ENSG00000117632 |
| 620. | SUMF1    | Sulfatase Modifying Factor 1                                       | ENSG00000144455 |
| 621. | SVIL     | Supervillin                                                        | ENSG00000197321 |
| 622. | SYK      | Spleen Associated Tyrosine Kinase                                  | ENSG00000165025 |
| 623. | TBATA    | Thymus, Brain And Testes Associated                                | ENSG00000166220 |
| 624. | TBC1D2   | TBC1 Domain Family Member 2                                        | ENSG00000095383 |
| 625. | TDG      | Thymine DNA Glycosylase                                            | ENSG00000139372 |
| 626. | TGFB1    | Transforming Growth Factor Beta 1                                  | ENSG00000105329 |
| 627. | TH       | Tyrosine Hydroxylase                                               | ENSG00000180176 |
| 628. | TLR1     | Toll Like Receptor 1                                               | ENSG00000174125 |
| 629. | TLR10    | Toll Like Receptor 10                                              | ENSG00000174123 |
| 630. | TLR3     | Toll Like Receptor 3                                               | ENSG00000164342 |
| 631. | TLR4     | Toll Like Receptor 4                                               | ENSG00000136869 |
| 632. | TLR5     | Toll Like Receptor 5                                               | ENSG00000187554 |
| 633. | TLR6     | Toll Like Receptor 6                                               | ENSG00000174130 |
| 634. | TLR7     | Toll Like Receptor 7                                               | ENSG00000196664 |
| 635. | TLR8     | Toll Like Receptor 8                                               | ENSG00000101916 |
| 636. | TLR9     | Toll Like Receptor 9                                               | ENSG00000239732 |
| 637. | TRB      | T Cell Receptor Beta Locus                                         |                 |
| 638. | TRIM10   | Tripartite Motif Containing 10                                     | ENSG00000204613 |
| 639. | TRIM15   | Tripartite Motif Containing 15                                     | ENSG00000204610 |
| 640. | TRIM2    | Tripartite Motif Containing 2                                      | ENSG00000109654 |

|      |         |                                                                                  |                 |
|------|---------|----------------------------------------------------------------------------------|-----------------|
| 641. | TRIM26  | Tripartite Motif Containing 26                                                   | ENSG00000234127 |
| 642. | TRIM40  | Tripartite Motif Containing 40                                                   | ENSG00000204614 |
| 643. | TYR     | Tyrosinase                                                                       | ENSG00000077498 |
| 644. | UBD     | Ubiquitin D                                                                      | ENSG00000213886 |
| 645. | VWA7    | Von Willebrand Factor A Domain<br>Containing 7                                   | ENSG00000204396 |
| 646. | WDR64   | WD Repeat Domain 64                                                              | ENSG00000162843 |
| 647. | WRN     | WRN RecQ Like Helicase                                                           | ENSG00000165392 |
| 648. | XAB2    | XPA Binding Protein 2                                                            | ENSG00000076924 |
| 649. | XPA     | XPA, DNA Damage Recognition And Repair<br>Factor                                 | ENSG00000136936 |
| 650. | XPC     | XPC Complex Subunit, DNA Damage<br>Recognition And Repair Factor                 | ENSG00000154767 |
| 651. | XRCC1   | X-Ray Repair Cross Complementing 1                                               | ENSG00000073050 |
| 652. | XRCC2   | X-Ray Repair Cross Complementing 2                                               | ENSG00000196584 |
| 653. | XRCC3   | X-Ray Repair Cross Complementing 3                                               | ENSG00000126215 |
| 654. | XRCC4   | X-Ray Repair Cross Complementing 4                                               | ENSG00000152422 |
| 655. | XRCC5   | X-Ray Repair Cross Complementing 5                                               | ENSG00000079246 |
| 656. | XRCC6   | X-Ray Repair Cross Complementing 6                                               | ENSG00000196419 |
| 657. | YWHAG   | Tyrosine 3-Monooxygenase/Tryptophan 5-<br>Monooxygenase Activation Protein Gamma | ENSG00000170027 |
| 658. | ZNF45   | Zinc Finger Protein 45                                                           | ENSG00000124459 |
| 659. | ZNF767P | Zinc Finger Family Member 767,<br>Pseudogene                                     | ENSG00000133624 |
| 660. | ZP4     | Zona Pellucida Glycoprotein 4                                                    | ENSG00000116996 |

**Supplementary Table S2.** Genes associated with obsessive-compulsive disorder base on literature review and Harmonizome database.

| Index | Official Symbol | Official Full Name                                              | Ensembl ID      |
|-------|-----------------|-----------------------------------------------------------------|-----------------|
| 1.    | 5HT2C           | 5-hydroxytryptamine receptor 2C                                 | ENSG00000147246 |
| 2.    | ADCY8           | Adenylate cyclase type 8                                        | ENSG00000155897 |
| 3.    | ANKK1           | Ankyrin repeat and kinase domain containing 1                   | ENSG00000170209 |
| 4.    | AQP2            | Aquaporin-2                                                     | ENSG00000167580 |
| 5.    | AR              | Androgen receptor                                               | ENSG00000169083 |
| 6.    | ARHGAP6         | Rho GTPase-activating protein 6                                 | ENSG00000047648 |
| 7.    | ARX             | Homeobox protein ARX                                            | ENSG00000004848 |
| 8.    | BCOR            | BCL-6 corepressor                                               | ENSG00000183337 |
| 9.    | BDKRB2          | B2 bradykinin receptor                                          | ENSG00000168398 |
| 10.   | BDNF            | Brain-derived neurotrophic factor                               | ENSG00000176697 |
| 11.   | BTBD3           | BTB/POZ domain-containing protein 3                             | ENSG00000132640 |
| 12.   | C16orf88        | Lysine rich nucleolar protein 1                                 | ENSG00000103550 |
| 13.   | CCKBR           | Gastrin/cholecystokinin type B receptor                         | ENSG00000110148 |
| 14.   | CDH10           | Cadherin-10                                                     | ENSG00000040731 |
| 15.   | CDH2            | Cadherin-2                                                      | ENSG00000170558 |
| 16.   | CDH9            | Cadherin-9                                                      | ENSG00000113100 |
| 17.   | CHCHD2          | Coiled-coil-helix-coiled-coil-helix domain-containing protein 2 | ENSG00000106153 |
| 18.   | CHRNA10         | Neuronal acetylcholine receptor subunit alpha-10                | ENSG00000129749 |
| 19.   | CLCN5           | H(+)/Cl(-) exchange transporter 5                               | ENSG00000171365 |
| 20.   | CNR1            | Cannabinoid receptor 1                                          | ENSG00000118432 |
| 21.   | CNTNAP2         | Contactin-associated protein-like 2                             | ENSG00000174469 |
| 22.   | COL27A1         | Collagen alpha-1(XXVII) chain                                   | ENSG00000196739 |
| 23.   | COMT            | Catechol O-methyltransferase                                    | ENSG00000093010 |
| 24.   | CTTNBP2         | Cortactin-binding protein 2                                     | ENSG00000077063 |
| 25.   | CYP2C19         | Cytochrome P450 2C19                                            | ENSG00000165841 |
| 26.   | CYP2D6          | Cytochrome P450 2D6                                             | ENSG00000100197 |
| 27.   | CYP2E1          | Cytochrome P450 2E1                                             | ENSG00000130649 |
| 28.   | DACH1           | Dachshund homolog 1                                             | ENSG00000276644 |
| 29.   | DLG4            | Disks large homolog 4                                           | ENSG00000132535 |
| 30.   | DLGAP1          | Disks large-associated protein 1                                | ENSG00000170579 |
| 31.   | DNM3            | Dynammin-3                                                      | ENSG00000197959 |
| 32.   | DRD1            | D(1A) dopamine receptor                                         | ENSG00000184845 |
| 33.   | DRD2            | D(2) dopamine receptor                                          | ENSG00000149295 |
| 34.   | DRD3            | D(3) dopamine receptor                                          | ENSG00000151577 |
| 35.   | DRD4            | Dopamine receptor D4                                            | ENSG00000069696 |
| 36.   | DUSP9           | Dual specificity protein phosphatase 9                          | ENSG00000130829 |
| 37.   | EAAT3           | Excitatory amino acid transporter 3                             | ENSG00000106688 |

|     |          |                                                                                 |                 |
|-----|----------|---------------------------------------------------------------------------------|-----------------|
| 38. | EFNB1    | Ephrin-B1                                                                       | ENSG00000090776 |
| 39. | ESR1     | Estrogen receptor                                                               | ENSG00000091831 |
| 40. | ESR2     | Estrogen receptor beta                                                          | ENSG00000140009 |
| 41. | FAIM2    | Protein lifeguard 2                                                             | ENSG00000135472 |
| 42. | FGF13    | Fibroblast growth factor 13                                                     | ENSG00000129682 |
| 43. | FKBP5    | Peptidyl-prolyl cis-trans isomerase FKBP5                                       | ENSG00000096060 |
| 44. | FOS      | Proto-oncogene c-Fos                                                            | ENSG00000170345 |
| 45. | FOXD4    | Forkhead box D4                                                                 | ENSG00000170122 |
| 46. | FUT2     | Galactoside 2-alpha-L-fucosyltransferase 2                                      | ENSG00000176920 |
| 47. | G6PD     | Glucose-6-phosphate 1-dehydrogenase                                             | ENSG00000160211 |
| 48. | GABBR1   | Gamma-aminobutyric acid type B receptor subunit 1                               | ENSG00000204681 |
| 49. | GABRG2   | Gamma-aminobutyric acid receptor subunit gamma-2                                | ENSG00000113327 |
| 50. | GAD1     | Glutamate decarboxylase 1                                                       | ENSG00000128683 |
| 51. | GAD2     | Glutamate decarboxylase 2                                                       | ENSG00000136750 |
| 52. | GPC6     | Glypican-6                                                                      | ENSG00000183098 |
| 53. | GRIA2    | Glutamate receptor 2                                                            | ENSG00000120251 |
| 54. | GRIA4    | Glutamate receptor 4                                                            | ENSG00000152578 |
| 55. | GRIK2    | Glutamate receptor ionotropic                                                   | ENSG00000164418 |
| 56. | GRIK3    | Glutamate receptor ionotropic                                                   | ENSG00000163873 |
| 57. | GRIN2B   | Glutamate receptor ionotropic                                                   | ENSG00000273079 |
| 58. | HACE1    | E3 ubiquitin-protein ligase HACE1                                               | ENSG00000085382 |
| 59. | HCN4     | Potassium/sodium hyperpolarization-activated cyclic nucleotide-gated channel 4; | ENSG00000138622 |
| 60. | HLA-DRB1 | HLA class II histocompatibility antigen, DRB1-15 beta chain                     | ENSG00000196126 |
| 61. | HTR1A    | 5-hydroxytryptamine receptor 1A                                                 | ENSG00000178394 |
| 62. | HTR1B    | 5-hydroxytryptamine receptor 1B                                                 | ENSG00000135312 |
| 63. | HTR1D    | 5-hydroxytryptamine receptor 1D                                                 | ENSG00000179546 |
| 64. | HTR2A    | 5-hydroxytryptamine receptor 2A                                                 | ENSG00000102468 |
| 65. | HTR2B    | 5-hydroxytryptamine receptor 2B                                                 | ENSG00000135914 |
| 66. | HTR3A    | 5-hydroxytryptamine receptor 3A                                                 | ENSG00000166736 |
| 67. | HTR3B    | 5-hydroxytryptamine receptor 3B                                                 | ENSG00000149305 |
| 68. | HTR3C    | 5-hydroxytryptamine receptor 3C                                                 | ENSG00000178084 |
| 69. | HTR3D    | 5-hydroxytryptamine receptor 3D                                                 | ENSG00000186090 |
| 70. | HTR3E    | 5-hydroxytryptamine receptor 3E                                                 | ENSG00000186038 |
| 71. | IKBKG    | NF-kappa-B essential modulator                                                  | ENSG00000269335 |
| 72. | IMMP2L   | Mitochondrial inner membrane protease subunit 2                                 | ENSG00000184903 |
| 73. | IQCK     | IQ motif containing K                                                           | ENSG00000174628 |
| 74. | ISM1     | Isthmin-1                                                                       | ENSG00000101230 |
| 75. | KCNH5    | Potassium voltage-gated channel subfamily H member 5                            | ENSG00000140015 |
| 76. | KCNK10   | Potassium channel subfamily K member 10                                         | ENSG00000100433 |
| 77. | LMX1A    | LIM homeobox transcription factor 1-alpha                                       | ENSG00000162761 |

|      |         |                                                                        |                 |
|------|---------|------------------------------------------------------------------------|-----------------|
| 78.  | LONRF3  | LON peptidase N-terminal domain and ring finger 3                      | ENSG00000175556 |
| 79.  | MAOA    | Amine oxidase A                                                        | ENSG00000189221 |
| 80.  | MAOB    | Amine oxidase                                                          | ENSG00000069535 |
| 81.  | MEIS2   | Homeobox protein Meis2                                                 | ENSG00000134138 |
| 82.  | MID1IP1 | Mid1-interacting protein 1                                             | ENSG00000165175 |
| 83.  | MNDA    | Myeloid cell nuclear differentiation antigen                           | ENSG00000163563 |
| 84.  | MOG     | Myelin-oligodendrocyte glycoprotein                                    | ENSG00000204655 |
| 85.  | mTOR    | Serine/threonine-protein kinase mTOR                                   | ENSG00000198793 |
| 86.  | MZT1    | Mitotic-spindle organizing protein 1                                   | ENSG00000204899 |
| 87.  | NEUROD6 | Neurogenic differentiation factor 6                                    | ENSG00000164600 |
| 88.  | NFKBIL1 | NF-kappa-B inhibitor-like protein 1                                    | ENSG00000204498 |
| 89.  | NHS     | Nance-Horan syndrome protein                                           | ENSG00000188158 |
| 90.  | NHSL2   | NHS-like protein 2                                                     | ENSG00000204131 |
| 91.  | nNOS    | Nitric oxide synthase                                                  | ENSG00000089250 |
| 92.  | NOS1AP  | Carboxyl-terminal PDZ ligand of neuronal nitric oxide synthase protein | ENSG00000198929 |
| 93.  | NPSR1   | Neuropeptide S receptor                                                | ENSG00000187258 |
| 94.  | NRCAM   | Neuronal cell adhesion molecule                                        | ENSG00000091129 |
| 95.  | NRXN1   | Neurexin-1                                                             | ENSG00000179915 |
| 96.  | NRXN3   | Neurexin-3                                                             | ENSG00000021645 |
| 97.  | NTRK1   | High-affinity nerve growth factor receptor                             | ENSG00000198400 |
| 98.  | NTRK2   | BDNF/NT-3 growth factors receptor                                      | ENSG00000148053 |
| 99.  | NTRK3   | NT-3 growth factor receptor                                            | ENSG00000140538 |
| 100. | OFCC1   | Orofacial cleft 1 candidate 1                                          | ENSG00000181355 |
| 101. | OLIG2   | Oligodendrocyte transcription factor 2                                 | ENSG00000205927 |
| 102. | OPRM1   | Mu-type opioid receptor                                                | ENSG00000112038 |
| 103. | OXTR    | Oxytocin receptor                                                      | ENSG00000180914 |
| 104. | PBX1    | Pre-B-cell leukemia transcription factor 1                             | ENSG00000185630 |
| 105. | PCDH10  | Protocadherin-10                                                       | ENSG00000138650 |
| 106. | PKM     | Pyruvate kinase PKM                                                    | ENSG00000067225 |
| 107. | PQBP1   | Polyglutamine-binding protein 1                                        | ENSG00000102103 |
| 108. | PTPRD   | Receptor-type tyrosine-protein phosphatase delta                       | ENSG00000153707 |
| 109. | REEP3   | Receptor expression-enhancing protein 3                                | ENSG00000165476 |
| 110. | RGS4    | Regulator of G-protein signalling 4                                    | ENSG00000117152 |
| 111. | RORB    | Nuclear receptor ROR-beta                                              | ENSG00000198963 |
| 112. | RYR3    | Ryanodine receptor 3                                                   | ENSG00000198838 |
| 113. | SAPAP3  | Disks large-associated protein 3                                       | ENSG00000116544 |
| 114. | SGCE    | Epsilon-sarcoglycan                                                    | ENSG00000127990 |
| 115. | SLC18A1 | Chromaffin granule amine transporter                                   | ENSG00000036565 |
| 116. | SLC1A2  | Excitatory amino acid transporter 2                                    | ENSG00000110436 |
| 117. | SLC22A3 | Solute carrier family 22 member 3                                      | ENSG00000146477 |
| 118. | SLC6A3  | Sodium-dependent dopamine transporter                                  | ENSG00000142319 |
| 119. | SLC6A4  | Sodium-dependent serotonin transporter                                 | ENSG00000108576 |
| 120. | SLITRK1 | SLIT and NTRK-like protein 1                                           | ENSG00000178235 |
| 121. | SLITRK3 | SLIT and NTRK-like protein 3                                           | ENSG00000121871 |

|      |         |                                                            |                 |
|------|---------|------------------------------------------------------------|-----------------|
| 122. | SLITRK5 | SLIT and NTRK-like protein 5                               | ENSG00000165300 |
| 123. | SV2A    | Synaptic vesicle glycoprotein 2A                           | ENSG00000159164 |
| 124. | TIMM17B | Translocase of inner mitochondrial membrane 17B            | ENSG00000126768 |
| 125. | TNFA    | Tumor necrosis factor                                      | ENSG00000232810 |
| 126. | TPH1    | Tryptophan hydroxylase 1                                   | ENSG00000129167 |
| 127. | TPH2    | Tryptophan hydroxylase 2                                   | ENSG00000139287 |
| 128. | TSC22D3 | TSC22 domain family protein 3                              | ENSG00000157514 |
| 129. | UCP2    | Mitochondrial uncoupling protein 2                         | ENSG00000175567 |
| 130. | ZNF75D  | Zinc finger protein 75D                                    | ENSG00000186376 |
| 131. | HOXB8   | Homeobox B8                                                | ENSG00000120068 |
| 132. | PRL     | Prolactin                                                  | ENSG00000172179 |
| 133. | CYP3A4  | Cytochrome P450 family 3 subfamily A member 4              | ENSG00000160868 |
| 134. | CAT     | Catalase                                                   | ENSG00000121691 |
| 135. | SLC22A2 | Solute carrier family 22 member 2                          | ENSG00000112499 |
| 136. | ABCB1   | ATP binding cassette subfamily B member 1                  | ENSG00000085563 |
| 137. | TH      | Tyrosine hydroxylase                                       | ENSG00000180176 |
| 138. | KCNH2   | Potassium voltage-gated channel subfamily H member 2       | ENSG00000055118 |
| 139. | ARC     | Activity regulated cytoskeleton associated protein         | ENSG00000198576 |
| 140. | HMGCS1  | 3-hydroxy-3-methylglutaryl-CoA synthase 1                  | ENSG00000112972 |
| 141. | EGR1    | Early growth response 1                                    | ENSG00000120738 |
| 142. | POMC    | Proopiomelanocortin                                        | ENSG00000115138 |
| 143. | NPY     | Neuropeptide Y                                             | ENSG00000122585 |
| 144. | NR3C1   | Nuclear receptor subfamily 3 group C member 1              | ENSG00000113580 |
| 145. | INHA    | Inhibin subunit alpha                                      | ENSG00000123999 |
| 146. | SOD1    | Superoxide dismutase 1                                     | ENSG00000142168 |
| 147. | BCL2    | BCL2 apoptosis regulator                                   | ENSG00000171791 |
| 148. | HOMER1  | Homer scaffold protein 1                                   | ENSG00000152413 |
| 149. | CASP3   | Caspase 3                                                  | ENSG00000164305 |
| 150. | CTNNB1  | Catenin beta 1                                             | ENSG00000168036 |
| 151. | MAPK1   | Mitogen-activated protein kinase 1                         | ENSG00000100030 |
| 152. | KCNJ3   | Potassium inwardly rectifying channel subfamily J member 3 | ENSG00000162989 |
| 153. | KCNJ6   | Potassium inwardly rectifying channel subfamily J member 6 | ENSG00000157542 |
| 154. | SLC18A2 | Solute carrier family 18 member A2                         | ENSG00000165646 |
| 155. | NUPR1   | Nuclear protein 1, transcriptional regulator               | ENSG00000176046 |
| 156. | CDK5    | Cyclin dependent kinase 5                                  | ENSG00000164885 |
| 157. | FOSB    | FosB proto-oncogene, AP-1 transcription factor subunit     | ENSG00000125740 |
| 158. | VEGFA   | Vascular endothelial growth factor A                       | ENSG00000112715 |
| 159. | JUN     | Jun proto-oncogene, AP-1 transcription factor subunit      | ENSG00000177606 |

|      |          |                                                             |                 |
|------|----------|-------------------------------------------------------------|-----------------|
| 160. | PENK     | Proenkephalin                                               | ENSG00000181195 |
| 161. | FNDC4    | Fibronectin type III domain containing 4                    | ENSG00000115226 |
| 162. | SYN      | Synaptophysin                                               | ENSG00000102003 |
| 163. | CRH      | Corticotropin releasing hormone                             | ENSG00000147571 |
| 164. | KCNJ5    | Potassium inwardly rectifying channel subfamily J member 5  | ENSG00000120457 |
| 165. | MAP2     | Microtubule associated protein 2                            | ENSG00000078018 |
| 166. | GDPD3    | Glycerophosphodiester phosphodiesterase domain containing 3 | ENSG00000102886 |
| 167. | BAX      | BCL2 associated X, apoptosis regulator                      | ENSG00000087088 |
| 168. | AKT1     | AKT serine/threonine kinase 1                               | ENSG00000142208 |
| 169. | IL6      | Interleukin 6                                               | ENSG00000136244 |
| 170. | GDNF     | Glial cell derived neurotrophic factor                      | ENSG00000168621 |
| 171. | INHBE    | Inhibin subunit beta E                                      | ENSG00000139269 |
| 172. | CREB1    | CAMP responsive element binding protein 1                   | ENSG00000118260 |
| 173. | CASP7    | Caspase 7                                                   | ENSG00000165806 |
| 174. | SLC2A3   | Solute carrier family 2 member 3                            | ENSG00000059804 |
| 175. | TAGLN    | Transgelin                                                  | ENSG00000149591 |
| 176. | CAMK4    | Calcium/calmodulin dependent protein kinase IV              | ENSG00000152495 |
| 177. | CYP2C8   | Cytochrome P450 family 2 subfamily C member 8               | ENSG00000138115 |
| 178. | EGR2     | Early growth response 2                                     | ENSG00000122877 |
| 179. | NR0B2    | Nuclear receptor subfamily 0 group B member 2               | ENSG00000131910 |
| 180. | C10ORF10 | DEPP1 autophagy regulator                                   | ENSG00000165507 |
| 181. | SERPINA3 | Serpin family A member 3                                    | ENSG00000196136 |
| 182. | GSTP1    | Glutathione S-transferase pi 1                              | ENSG00000084207 |
| 183. | MAPK3    | Mitogen-activated protein kinase 3                          | ENSG00000102882 |
| 184. | HTR7     | 5-hydroxytryptamine receptor 7                              | ENSG00000148680 |
| 185. | GABRA1   | Gamma-aminobutyric acid type A receptor subunit alpha1      | ENSG00000022355 |
| 186. | DUSP1    | Dual specificity phosphatase 1                              | ENSG00000120129 |
| 187. | DBH      | Dopamine beta-hydroxylase                                   | ENSG00000123454 |
| 188. | GRIA3    | Glutamate ionotropic receptor AMPA type subunit 3           | ENSG00000125675 |
| 189. | FAS      | Fas cell surface death receptor                             | ENSG00000026103 |
| 190. | FABP1    | Fatty acid binding protein 1                                | ENSG00000163586 |
| 191. | CYP3A5   | Cytochrome P450 family 3 subfamily A member 5               | ENSG00000106258 |



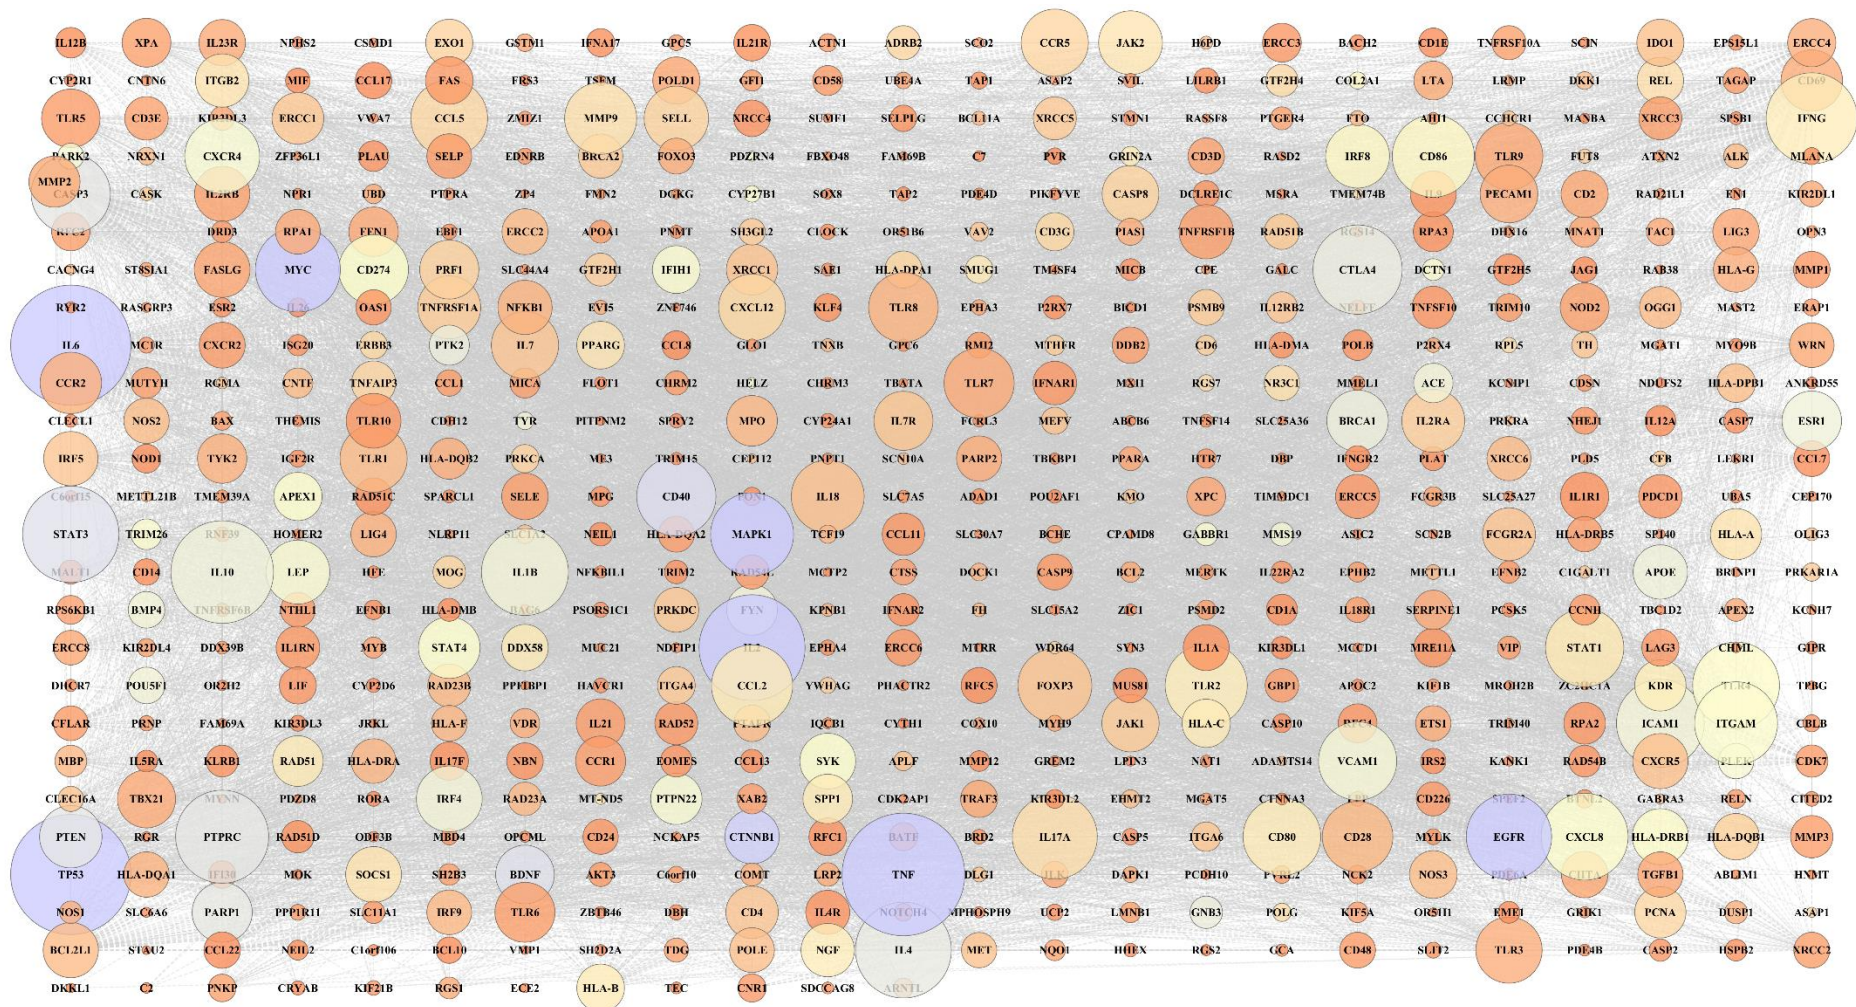

Supplementary Figure S2. The genetic network of genes related to multiple sclerosis. In this network the larger nodes indicate higher degree and more connected nodes and



darker colors (dark orange) mean greater betweenness centrality (network parameters: density=0.060, diameter= 9, centralization= 0.304). Nodes with any connections have been excluded.

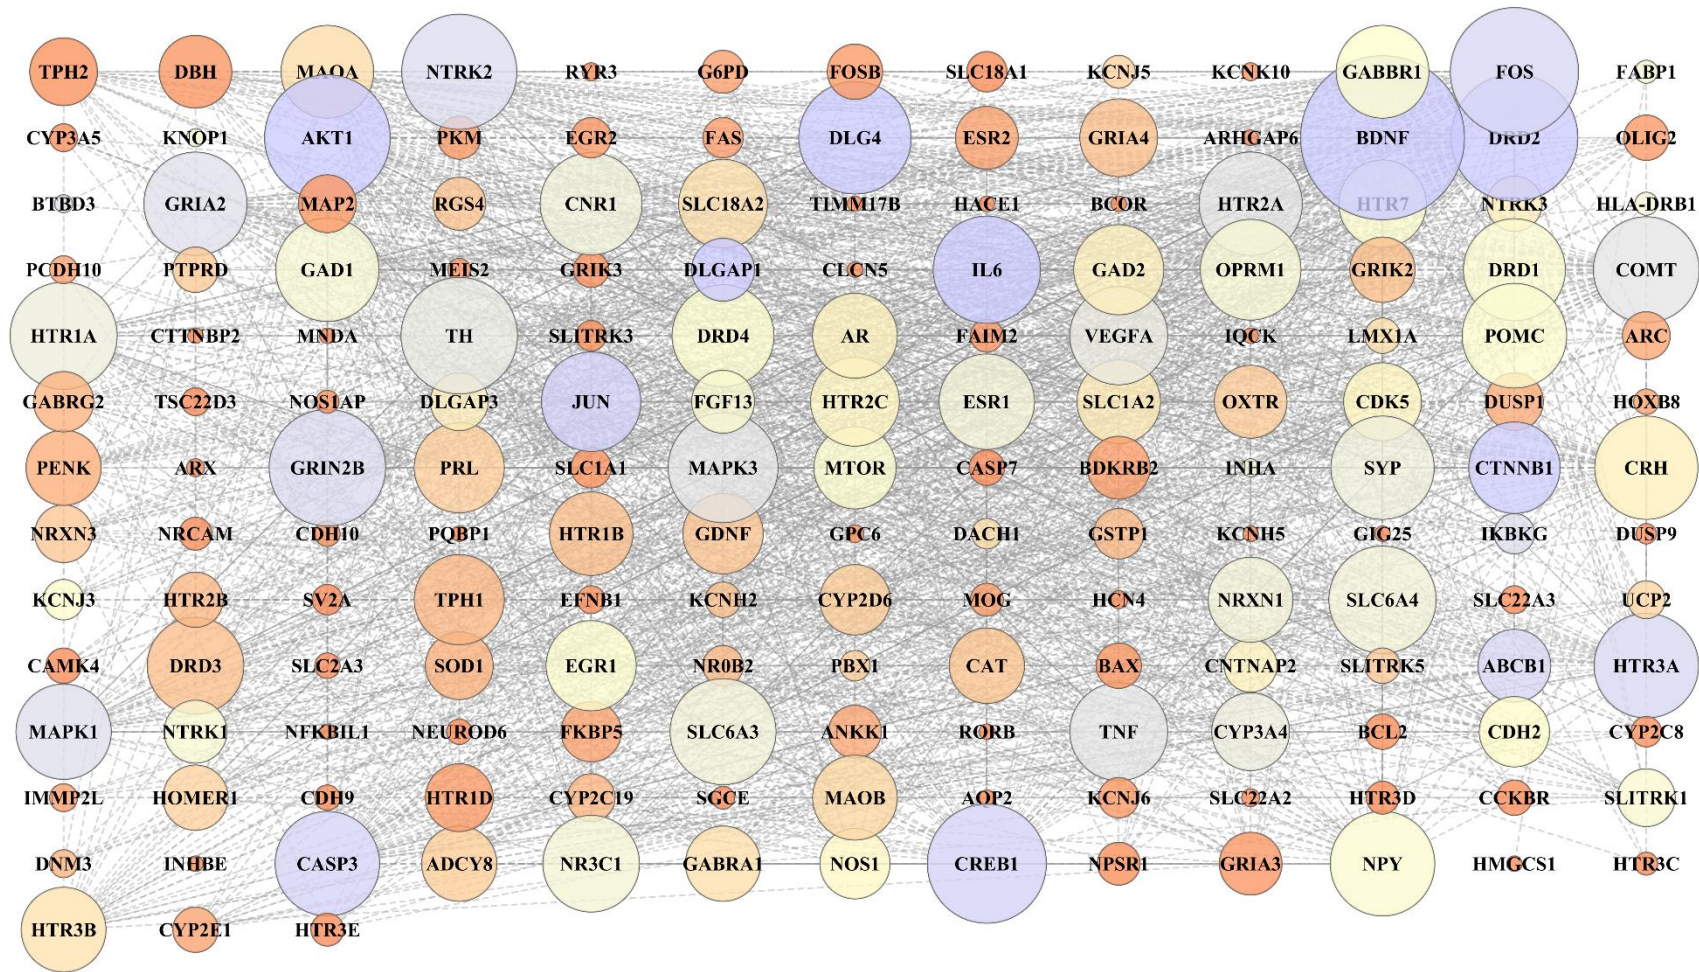

**Supplementary Figure S3.** The genetic network of genes related to obsessive-compulsive disorder. In this network the larger nodes indicate higher degree and more connected nodes and darker colors (dark orange) mean greater betweenness centrality (network parameters: density= 0.120, diameter= 8, centralization= 0.411). Nodes with any connections have been excluded.

## References

1. Zhang J, Luo Y. Degree centrality, betweenness centrality, and closeness centrality in social network. In: 2017 2nd International Conference on Modelling, Simulation and Applied Mathematics (MSAM2017). 2017, p. 300-303. Atlantis Press.
2. Golbeck J. Chapter 3 - Network Structure and Measures. In: Golbeck J. (ed) Analyzing the Social Web. Boston: Morgan Kaufmann, 2013, 25-44.
3. Zito A, Lualdi M, Granata P et al. Gene Set Enrichment Analysis of Interaction Networks Weighted by Node Centrality, Frontiers in Genetics 2021;12.
